# Supplementary material for: Clinical and Molecular Spectrum Along With Genotype-Phenotype Correlation of 25 Patients Diagnosed With 3M Syndrome: A Study from Turkey
Source: Research Square preprint supplement (doi:10.21203/rs.3.rs-4764698/v1), 2024-08-19
Supplement: Supplementary file 1 [file 09c83f045a6f2c11b4fda7f8.docx]

| Table 1. Clinical, and radiographic findings of 3M syndrome patients with *CUL7*, *OBSL1*, and *CCDD8* variants | | | | | | | | | | |
| --- | --- | --- | --- | --- | --- | --- | --- | --- | --- | --- |
| Group | CUL7 |  |  |  |  |  |  |  |  |  |
| Family | 1 |  |  | 2 | 3 | 4 |  | 5 | 6 | 7 |
| Patient | 1 | 2 | 3 | 4 | 5 | 6 | 7 | 8 | 9 | 10 |
| Consanguinity | First cousin | | | First cousin | First cousin | Second cousin | | First Cousin | First cousin | First cousin |
| Sex | M | F | F | F | F | M | M | M | F | M |
| Antenatal USG | N | N | N | N/A | IUGR | IUGR | IUGR | IUGR shortened long bones | N | N |
| Birth weight (g/SD) | 2300/-2.6 | 2150/-2.6 | 2300/-2.1 | N/A | 1500 /-4.0 | 2400/-2.3 | 2200/-2.9 | 2025/-3.6 | 2000 /-3.0 | 2100/-3.3 |
| Birth length (cm/SD) | 48/0.8 | 48/-0.5 | 45/-1.9 | N/A | 40/-3.4 | 44/-2.6 | 42/-3.4 | 39/-4.5 | 43/-2.8 | 43/-3.0 |
| Neonatal respiratuary distress | - | - | - | - | - | - | - | - | - | - |
| Age at admisson (years) | 410/12 | 30/12 | 26/12 | 101/12 | 07/12 | 94/12 | 59/12 | 08/12 | 1110/12 | 41/12 |
| Age at diagnosis (years) | 910/12 | 84/12 | 511/12 | 1510/12 | 88/12 | 1011/12 | 74/12 | 08/12 | 123/12 | 71/12 |
| Current age, (years) | 1010/12 | 91/12 | 68/12 | 161/12 | 98/12 | 1011/12 | 74/12 | 08/12 | 124/12 | 74/12 |
| Weight at admission (kg/SD) | 13/-2.8 | 9.9/-2.8 | 8.9/-3.0 | 18.5/-3.2 | 4.6/-4.6 | 19/-3.1 | 11.7**/-4.7** | 4.9/-4.4 | 18/-4.9 | 10/-4.6 |
| Height at admission (cm/SD) | 85/-5.4 | 75.5/-5.0 | 72.5/-4.9 | 100/-6.0 | 56/-5.2 | 108.5/**-4.5** | 94**/-4,5** | 59/-**4,6** | 111/-6.4 | 75/-6.9 |
| OFC at admisson (cm/SD) | N/A | N/A | N/A | N/A | 42/-1.6 | 51.5/**-1.2** | 51**/ -0,5** | 43/-1.7 | 52.5/-1.0 | N/A |
| Arm span at admisson | N/A | N/A | N/A | N/A | N/A | 105 | 90 | 58 | 111 | N/A |
| BMI at admisson (SD) | 17.99/1.5 | 17.37/1.3 | 16.93/0.8 | 18.5/0.5 | 14.67/-1.7 | 16.14/-0.3 | 13.24/-1.8 | 14.08/-2.4 | 14.61/-2.0 | 17.7/1.3 |
| Current weight (kg/SD) | 22/-3.0 | 18.4/-2.8 | 14.4/-3.0 | 33.6/-4.5 | 20/-2.5 | 23.5/-2.6 | 15/-3.5 | 4.9/-4.4 | 19/-5.3 | 12.5/-5.4 |
| Current height (cm/SD) | 110/-5.2 | 108/-4.2 | 96/-4.8 | 117.4/-7.7 | 112/-3.9 | 116.1/-4.2 | 99.5/**-4.7** | 59/-**4,6** | 112/-6.7 | 88.2/-6.9 |
| Current OFC (cm/SD) | 52/-1.34 | 52/-0.25 | 51/-0.2 | 56/0.2 | 51.5/-0.8 | 53/-0.7 | 51/-0.8 | 43/-1.7 | 53/-0.9 | 52/-0.1 |
| Current arm span (cm) | 109 | 100 | 92 | 125 | 107 | 113 | 99 | 58 | 113 | 90 |
| Current BMI(SD) | 18.18/0.03 | 15.78/-0.3 | 15.62/0.03 | 24.38/1.2 | 15.94/-0.4 | 17.43/-0.3 | 15.15/-0.5 | 14.08/-2.4 | 15.1/-1.9 | 15.2/-0.4 |
| Clinical features |  |  |  |  |  |  |  |  |  |  |
| Relative macrocepahly | + | + | + | + | + | + | + | + | + | + |
| Dolicocephaly | + | + | + | + | + | + | + | + | - | + |
| High anterior hairline | - | + | + | + | + | - | - | + | - | - |
| Triangular face | + | + | + | + | + | + | + | + | + | + |
| Frontal bossing | - | - | - | - | - | - | - | + | - | - |
| Downslanting palpebral fissures | - | + | + | + | - | + | + | - | - | - |
| Wide palpebral fissures | - | + | + | + | + | + | + | + | + | + |
| Blue sclera | - | - | - | - | - | + | + | - | grey | grey |
| Periorbital fullness | - | + | - | + | - | - | - | + | - | - |
| Bifid uvula | - | - | - | - | - | - | - | + | - | - |
| High-arched palate | + | + | + | + | + | + | + | - |  | - |
| Prominent chin | + | + | + | + | + | + | + | + | + | - |
| Long philtrum | + | + | + | + | + | + | + | + | + | + |
| Prominent eyebrows | - | - | - | + | + | + | + | - | + | + |
| 1/3 lateral flared eyebrows | + | + | - | - | - | - | - | + | - | - |
| Ear helix anomaly | - | - | - | - | - | - | - | - | - | - |
| Fleshy nose | + | + | + | + | + | + | + | + | + | + |
| Short nose | + | + | + | + | + | + | + | + | + | + |
| Depressed nasal bridge | + | + | + | + | + | + | + | + | + | + |
| Anteverted nares | + | + | + | + | + | + | + | + | + | + |
| Fleshy lips | + | + | + | + | + | + | + | + | + | + |
| Short neck | + | + | + | + | + | + | + | + | + | + |
| Pectus carinatum/excavatum | -/- | -/- | -/- | -/- | -/+ | -/+ | -/+ | +/- | +/- | -/+ |
| Clinodactyly | - | + | - | + | + | + | + | + | + | + |
| Protruding abdomen | + | + | + | + | + | + | + | + | + | + |
| Hyperlordosis | + | + | + | + | + | + | + | - | + | + |
| Scoliosis | - | - | - | - | - | + | - | - | + | - |
| Joint laxity | + | + | + | + | + | + | - | - | + | + mild |
| Pes planus | + | + | + | + | + | + | + | - | + | + |
| Prominent heels | + | + | + | + | + | + | + | + | - | - |
| Radiologic feaurues |  |  |  |  |  |  |  |  |  |  |
| Copper beaten skull | + | + | + | - | + | - | - | - | + | - |
| Delayed bone age | - | - | + | - | - | + | + | + | - | + |
| Tall vertabrae | + | - | - | + | + | + | + | - | + | - |
| Vertebrae body irregularity | + | - | - | + | - | - | - | - | - | - |
| Anterior wedging of vertebrae | - | - | - | - | - | - | - | + | - | - |
| Scoliosis | - | - | - | mild | - | - | - | - | - | - |
| Thin ribs | + | + | + | + | + | + | + | + | + | + |
| Slender long bones | + | + | + | + | + | + | + | + | + | + |
| Short and broad thorax | + | + | + | + | + | + | + | + | + | + |
| Diaphyseal constriction | + | + | + | + | + | + | + | - | + | + |
| Flared epi-metaphyses | + | + | + | - | + | + | + | + | - | + |
| Narrow pelvis | + | + | + | + | + | + | + | - | + | + |
| Hip dislocation | - | - | - | bilateral | - | - | - | - | bilateral | unilateral |
| Short femoral neck | + | + | + | + | - | + | + | - | + | + |
| Coxa valga | - | - | - | + | - | - | - | - | + | - |
| Coxa vara | - | + | + | - | - | + | + | - | - | - |
| Other fetaures | - | Shortened of 4th and 5th metacarpals | - | - | ASD | - | - | nephrolitiasis | - | - |

| Group | CUL7 |  |  | OBSL1 |  |  |  |  |  |
| --- | --- | --- | --- | --- | --- | --- | --- | --- | --- |
| Family | 8 | 9 | 10 | 11 | 12 |  | 13 | 14 |  |
| Patient | 11 | 12 | 13 | 14 | 15 | 16 | 17 | 18 | 19 |
| Consanguinity | First cousin | First cousin | None | First cousin | First cousin | | First cousin | First cousin |  |
| Sex | M | F | M | M | F | M | M | M | M |
| Antenatal USG | Normal | Short limbs | Short limbs, macrocephaly | oligohydramnios | IUGR | IUGR,  macroephaly,  shortened long bones | IUGR,  macrocephaly shortened long bones | IUGR | N/A |
| Birth weight (g/SD) | 2000/-3.7 | 2710/-1.4 | 2470/-2.1 | 2300/-2.6 | 1750/-3.8 | 2400/-2.3 | 2445/-2.7 | 2000/-3.7 | 2200/-3.0 |
| Birth length (cm/SD) | 42/-3.4 | N/A | 42/-3.4 | 44/-2.6 | 42/-3.2 | 44/-2.6 | 45/-2.5 | 42/-3.4 | 43/-3.0 |
| Neonatal respiratuary distress | + | - | + | - | - | - | - | - | - |
| Age at admisson | 108/12 | 0 day | 07/12 | 16/12 | 86/12 | 13 3/12 | 09/12 | 12/12 | 4 3/12 |
| Age at diagnosis | 138/12 | 06/12 | 23/12 | 22/12 | 11 1/12 | 135/12 | 91/12 | 7 6/12 | 13 7/12 |
| Current age, (years) | 138/12 | 310/12 | 23/12 | 510/12 | 11 1/12 | 158/12 | 96/12 | 1010/12 | 17 10/12 |
| Weight at admission (kg/SD) | 17/-4.7 | 2.7/-1.4 | 4.5/-4.51 | 6.5 /-4.7 | 16.3/-3.4 | 48/-0.3 | 5.3/-4.3 | 6.8/-3.6 | 13.5/-2.0 |
| Height at admission (cm/SD) | 99.5/-6.7 | N/A | 56/-5.16 | 68/-4.2 | 107.7/-3.9 | 140/-2.5 | 58.9/-5.1 | 64/-4.6 | 86.3/-4.5 |
| OFC at admission (cm/SD) | 52/-1.3 | 37/1.81 | 45/0.03 | 49/0.4 | N/A | N/A | 45.3 /-0.5 | 46.5/-0.9 | N/A |
| Arm span at admisson | 105 | N/A | 51 | N/A | N/A | 147 | N/A | N/A | N/A |
| BMI at admisson (SD) | 17.17/-0.3 | N/A | 14.35/-2.19 | 14.06/-2.1 | 14.05/-1.2 | 24.49/1.2 | 15.28/-1.5 | 16.6/-0.3 | 18.1/1.5 |
| Current weight (kg/SD) | 20.0/-4.9 | 10.8/-3.0 | 7.0/-6.0 | 13.7/-3.2 | 27/**-1.8** | 51/-1.6 | 22/-2.2 | 40/0.4 | 49/-2.9 |
| Current height (cm/SD) | 109.5/-6.8 | 81.4/-4.6 | 68/-5.9 | 95.2/-4.2 | 122.7/-3.3 | 144.7/-4.1 | 123/-2.1 | 120/-3.6 | 146/-4.8 |
| Current OFC (cm/SD) | N/A | 53.5/2.4 | 50.5/0.6 | 54/1.5 | 53/-0.3 | 58 /0.6 | 54/0.5 | 54/0.1 | 59/0.9 |
| Current arm span (cm) | N/A | 81 | 64.5 | 98.5 | 118 | 147 | 121 | 115 | 142 |
| Current BMI SD | 16.7/-1.4 | 16.3/0.6 | 15.1/-0.8 | 15.1/-0.2 | 17.9/-0.0 | 24.3/0.8 | 14.5/-1.3 | 27.8/2.2 | 23.0/0.0 |
| Clinical features |  |  |  |  |  |  |  |  |  |
| Relative macrocepahly | + | + | + | + | + | + | + | + | + |
| Dolicocephaly | + | + | + | + | - | + | + | + | + |
| High anterior hairline | - | + | + | + | + | + | - | + | + |
| Triangular face | + | + | + | + | + | + | + | + | + |
| Frontal bossing | + | + | + | + | + | - | - | - | - |
| Downslanting palpebral fissures | - | - | - | - | - | + | - | - | - |
| Wide palpebral fissures | + | + | + | + | - | + | + | + | + |
| Blue sclera | - | - | - | + | - | - | - | - | - |
| Periorbital fullness | - | - | + | + | - | - | + | + | - |
| Bifid uvula | - | - | - | - | - | - | - | - | - |
| High-arched palate | - | + | + | - | - | - | + | - | - |
| Prominent chin | + | + | + | + | + | + | + | - | - |
| Long philtrum | + | + | + | + | + | - | + | - | - |
| Prominent eyebrows | - | - | - | + | + | + | + | + | + |
| 1/3 lateral flared eyebrows | - | - | - | + | + | - | - | - | - |
| Ear helix anomaly | - | - | + | - | - | - | - | - | - |
| Fleshy nose | + | + | + | + | + | + | + | + | + |
| Short nose | - | + | + | - | - | - | - | - | - |
| Depressed nasal bridge | - | + | + | + | - | + | - | - | - |
| Anteverted nares | + | + | + | + | - | + | + | + | + |
| Fleshy lips | + | - | - | + | - | + | + | + | + |
| Short neck | - | + | + | + | + | + | + | + | + |
| Pectus carinatum/excavatum | + | - | + | +/- | -/- | +/- | -/- | -/- | -/+ |
| Clinodactyly | + | + | - | + | + | + | + | + | + |
| Protruding abdomen | + | + | + | + | + | + | + | + | - |
| Hyperlordosis | + | + | - | + | + | - | - | + | - |
| Scoliosis | + | - | - | - | - | + | + | - | - |
| Joint laxity | + | + | + | + | - | +  (bilateral knee dislocaion) | + | + | + |
| Pes planus | + | + | + | + | + | + | - | + | + |
| Prominent heels | + | + | + | + | + | + | + | - | + |
| Radiologic feaurues |  |  |  |  |  |  |  |  |  |
| Copper beaten skull | - | - | - | + | + | + | - | - | - |
| Delayed bone age | + | + | + | + | - (advanced) | -(advanced) | - | - | - |
| Tall vertabrae | - | N/A | - | + | + | + | - | + | + |
| Vertebrae body irregularity | - | N/A | - | - | + | - | - | - | - |
| Anterior wedging of vertebrae | - | N/A | - | + | - | - | - | + | - |
| Scoliosis | + | N/A | - | - | - | + | + | - | - |
| Thin ribs | - | N/A | - | - | + | + | + | + | + |
| Slender long bones | - | N/A | - | + | + | + | + | + | + |
| Flared metaphyses | + | N/A | + | + | - | - | + | - | - |
| Short and broad thorax | - | N/A | - | + | - | + | - | + | + |
| Diaphyseal constriction | + | N/A | + | + | + | + | + | + | + |
| Narrow pelvis | + | N/A | - | + | + | + | - | + | + |
| Hip dislocation | + | N/A | - | - | - | - | - | - | - |
| Short femoral neck | + | N/A | - | - | + | + | + | + | + |
| Coxa valga | - | N/A | - | - | - | + | + | + | + |
| Coxa vara | + | N/A | - | - | + | - | - | + | + |
| Other fetaures | - | - | - | - | Ascending aortic dilatation, hepatosteatosis | Recurrent knee dislocations, right cryptorchidism, aortic root dilatation | hypothyroidism | Frequent otitis media, gradenigo syndrome | epilepsy |

| Group | OBSL1 |  |  |  |  | CCDC8 |
| --- | --- | --- | --- | --- | --- | --- |
| Family | 15 | 16 | 17 |  | 18 | 19 |
| Patient | 20 | 21 | 22 | 23 | 24 | 25 |
| Consanguinity | None | Second cousin | First cousin |  | First cousin | First cousin |
| Sex | M | M | M | F | M | F |
| Antenatal USG | N/A | IUGR, shortened long bones | IUGR | IUGR | IUGR, shortened long bones, | IUGR |
| Birth weight (g/SD) | 2150/-3.1 | 2230/-2.8 | 2280/-2.7 | 2180/-2.5 | 2170/-3.0 | 2455/-1.7 |
| Birth length (cm/SD) | 42/-3.4 | 38/-4.8 | 41/-3.8 | 39/-4.2 | 40/-4.1 | 46/-1.5 |
| Neonatal respiratuary distress | - | + | - | - | + | + |
| Age at admisson | 46/12 | 02/12 | 46/12 | 33/12 | 03/12 | 03/12 |
| Age at diagnosis | 79/12 | 08/12 | 62/12 | 411/12 | 03/12 | 010/12 |
| Current age, (years) | 86/12 | 16/12 | 205/12 | 192/12 | 05/12 | 36/12 |
| Weight at admission (kg/SD) | 13/-2.5 | 3.4/-2.7 | 12.7/-2.7 | 9.5/-3.4 | 3.9/-2.9 | 4.5/-1.8 |
| Height at admission (cm/SD) | 91/-3.7 | 48/-3.6 | 89/-4.2 | 79/-4.4 | 52/-3.4 | 51/-3.5 |
| OFC at admission (cm/SD) | 49/-1.6 | 40/0.2 | 49.5/-1.3 | 47/-1.4 | 40/-0.8 | 39/-0.7 |
| Arm span at admisson | N/A | 47 | N/A | N/A | N/A | N/A |
| BMI at admisson (SD) | 15.7/0.07 | 14.76/-1.0 | 16.03/0.3 | 15.22/-0.25 | 14.4/-1.6 | 17.3/0.7 |
| Current weight (kg/SD) | 18/-2.8 | 6.7/-4.4 | 19.2/-0.7 | 13/-2.5 | 5/-2.9 | 11/-2.5 |
| Current height (cm/SD) | 110/-3.6 | 68.5/-4.1 | 158 /-2.95 | 148/-2.57 | 53.5/-4.8 | 81/-4.2 |
| Current OFC (cm/SD) | 51/-1.2 | 47/-0.9 | 50/-1.3 | 49/-1.1 | 42.5/-0.7 | 48/-1.1 |
| Current arm span (cm) | N/A | 65 | 98 | 89 | 55 | N/A |
| Current BMI SD | 14.88/-0.9 | 14.28/-1.9 | 18.27/1.53 | 14.84/-0.4 | 17.5/0.0 | 16.77/0.9 |
| Clinical features |  |  |  |  |  |  |
| Relative macrocepahly | + | + | + | + | + | + |
| Dolicocephaly | + | + | + | + | + | - |
| High anterior hairline | - | + | + | + | + | - |
| Triangular face | - | + | + | + | + | - |
| Frontal bossing | - | + | + | + | + | + |
| Downslanting palpebral fissures | - | + | + | + | - | - |
| Wide palpebral fissures | + | + | + | + | + | - |
| Blue sclera | - | - | + | + | - | - |
| Periorbital fullness | - | + | - | - | + | - |
| Bifid uvula | - | - | - | - | - | - |
| High-arched palate | - | - | + | + | - | - |
| Prominent chin | - | + | + | + | + | - |
| Long philtrum | + | + | + | + | + | + |
| Prominent eyebrows | + | + | + | + | - | + |
| 1/3 lateral flared eyebrows | - | - | - | - | + | - |
| Ear helix anomaly | - | + | - | - | - | - |
| Fleshy nose | + | + | + | + | + | + |
| Short nose | + | + | + | + | + | - |
| Depressed nasal bridge | + | + | + | + | + | - |
| Anteverted nares | + | + | + | + | + | - |
| Fleshy lips | - | + | + | + | + | - |
| Short neck | + | + | + | + | + | + |
| Pectus carinatum/excavatum | -/- | +/- | +/- | +/ | +/- | -/- |
| Clinodactyly | + | + | + | + | + | + |
| Protruding abdomen | + | + | + | + | + | - |
| Hyperlordosis | + | - | + | + | + | - |
| Scoliosis | - | - | - | - | - | - |
| Joint laxity | - | - | - | - | - | - |
| Pes planus | + | - | + | + | - | - |
| Prominent heels | + | + | - | - | + | + |
| Radiologic feaurues |  |  |  |  |  |  |
| Copper beaten skull | + | - | - | - | - | + |
| Delayed bone age | + | + | + | + | + | + |
| Tall vertabrae | + | + | + | + | - | - |
| Vertebrae body irregularity | - | - | - | - | - | - |
| Anterior wedging of vertebrae | - | - | - | - | - | - |
| Scoliosis | - | - | - | - | - | - |
| Thin ribs | + | + | + | + | - | - |
| Slender long bones | + | + | + | + | - | + |
| Flared metaphyses | + | + | + | + | - | + |
| Short and broad thorax | + | + | + | + | + | + |
| Diaphyseal constriction | + | - | + | + | - | + |
| Narrow pelvis | - | + | + | + | - | - |
| Hip dislocation | - | - | - | - | - | - |
| Short femoral neck | + | + | + | + | - | + |
| Coxa valga | - | - | - | - | - | - |
| Coxa vara | - | - | - | - | - | + |
| Other fetaures | - | Frontal hemangioma | - | - | - | - |
