# Supplementary material for: Clinical and Molecular Spectrum Along With Genotype-Phenotype Correlation of 25 Patients Diagnosed With 3M Syndrome: A Study from Turkey
Source: Research Square preprint supplement (doi:10.21203/rs.3.rs-4764698/v1), 2024-08-19
Supplement: Supplementary file 2 [file 1ff543d8c017034777223096.docx]

**Sanger Sequencing:**

Genomic DNA extraction from peripheral blood lymphocytes of both patients and/or their family members was accomplished using the MagNA Pure 96 DNA and Viral NA Small Volume Kit. following the manufacturer's instructions. DNA sequencing was performed using BigDye terminator chemistry 3.1 on the 3130 Genetic Analyzer (Applied Biosystems). All exons and the exon-intron boundaries of *CUL7*, *OBSL1*, and *CCDC8* were sequenced. Primer sequences and PCR conditions are available on request.

**Targeted gene panel:**

NGS was performed using the Roche HyperCap Designed Share (DS) Inherited Disease Panel kit covering 4125 genes. Samples were prepared following the respective kit protocols, which involved capturing exonic regions of interest using targeted probes.

Sequencing: The prepared NGS samples were sequenced on the MGI sequencing platform, DNBSEQ-G400. This process generated raw sequencing data in the form of short reads, representing the DNA fragments.

**Variant Classification and Analysis:** The raw sequencing data (FASTQ files) were uploaded to the SEQ Platform developed by Genomize Inc. The reads were aligned to the human reference genome GRCh37 using the Burrows-Wheeler Aligner [1]. Variant calling was performed using FreeBayes [2], followed by additional steps such as PCR deduplication and in-del realignment using Genomize's proprietary algorithms. Identified variants were annotated using VEP v102[3] to provide functional annotations. ACMG pathogenicity classification was conducted using Genomize's proprietary algorithm based on the guideline published by Richards et al. [4].

**Copy Number Variation (CNV) Analysis:** CNV analysis was conducted using the SEQ Platform from Genomize Inc. Reads aligned to the human reference genome GRCh37 were processed with the GATK gCNV tool v4.1.8.1[5] using optimized parameters to detect and analyze copy number variations. Additional information from external sources, such as ClinVar entries, bioinformatics-based effect prediction tool scores, and variant frequency values in the SEQ cohort, were considered during the analysis to further assess variant significance and frequency.

**Statical analysis**

Data was analyzed using the Statistical Package for the Social Sciences version 23.0 for Windows (SPSS, Inc., Chicago, IL). Descriptive statistics for quantitative data included arithmetic mean, standard deviation, median, and minimum-maximum values. Qualitative data were summarized using frequency and percentages. The Kolmogorov-Smirnov test was used to determine the normality of each quantitative variable. The independent sample t-test and Mann–Whitney U test were used to compare two independent groups for normally and non-normally distributed variables, respectively. A p-value of <0.05 was considered statistically significant.

**References:**

1.Li H, Durbin R, et al. Fast and accurate short read alignment with Burrows-Wheeler transform. Bioinformatics 2009;25(14):1754-60.

2.Garrison E, Marth G, et al. Haplotype-based variant detection from short-read sequencing. arXiv preprint arXiv:1207.3907 2012.

3.McLaren W, Gil L, Hunt SE, Riat HS, Ritchie GR, Thormann A, et al. The Ensembl Variant Effect Predictor. Genome Biol 2016;17(1):122.

4..Richards S, Aziz N, Bale S, Bick D, Das S, Gastier-Foster J, et al; ACMG Laboratory Quality Assurance Committee. Standards and guidelines for the interpretation of sequence variants: a joint consensus recommendation of the American College of Medical Genetics and Genomics and the Association for Molecular Pathology. Genet Med 2015;17(5):405-24.

5..Babadi M, Fu JM, Lee SK, Smirnov AN, Gauthier LD, Walker M et al.GATK-gCNV enables the discovery of rare copy number variants from exome sequencing data. Nat Genet. 2023 Sep;55(9):1589-1597.
