# Supplementary material for: Clinical and Molecular Spectrum Along With Genotype-Phenotype Correlation of 25 Patients Diagnosed With 3M Syndrome: A Study from Turkey
Source: Research Square preprint supplement (doi:10.21203/rs.3.rs-4764698/v1), 2024-08-19
Supplement: Supplementary file 3 [file 437a136509227cfd70df1590.docx]

|  | Supplemental Table 1. Variants detected in the present study and their pathogenicity according to in silico prediction tools and public databases | | | | | | | | | |
| --- | --- | --- | --- | --- | --- | --- | --- | --- | --- | --- |
| *Group* | **CUL7 (NM_014780.5)** | | | | | | | | | |
| *Family* | 1 | 2 | 3 | 4 | 5 | 6 | 7 | 8 | 9 | 10 |
| *Patient* | 1 2 3 | 4 | 5 | 6 7 | 8 | 9 | 10 | 11 | 12 | 13 |
| *Genetics* |  |  |  |  |  |  | |  |  |  |
| *c. DNA* | c.206dup  c.3076del | c.3076del | c.3106 C>T | c.4186C>T | c.4060G>T | c.206dup | | c.2109del | c.2326_2327delGT | c.4534dup  1-7 exon deletion |
| *Protein change* | p.M69Ifs*5  p.D1026Tfs*115 | p.D1026Tfs*115 | p.Q1036* | p.R1396* | p.E1354* | p.M69Ifs*5 | | p.W704Gfs*25 | p.F777Qfs*3 | p.L1512Pfs*42  - |
| *Population data* |  |  |  |  |  |  | |  |  |  |
| *gnomAD v4.0* | N/A  N/A | N/A | 0.00000636 | 0.00000479 | N/A | N/A | | N/A | N/A | N/A |
| *gnomAD v4.0*  *homozygotes* | N/A  N/A | N/A | 0 | 0 | N/A | N/A | | N/A | N/A | N/A |
| *Turkish Variome* | N/A  N/A | N/A | N/A | N/A | N/A | N/A | | N/A | N/A | N/A |
| *In silico prediction* |  |  |  |  |  |  | |  |  |  |
| *GERP score* | N/A  5.1 | 5.1 | 5.2 | 4.8 | -3.9 | N/A | | N/A | N/A | N/A |
| *DANN* | N/A  N/A |  | deleterious | deleterious | deleterious | N/A | | N/A | N/A | N/A |
| *Mutation Taster* | N/A  N/A | N/A | deleterious | deleterious | deleterious | N/A | | N/A | N/A | N/A |
| *ACMG classification* | P  LP | LP | LP | LP | LP | P | | LP | LP | LP |
| *ACMG evidence* | PVS1, PM3, PM2, PP5  PVS1, PM2 | PVS1, PM2 | PVS1, PM2 | PVS1, PM2 | PVS1, PM2 | PVS1, PM3, PM2, PP5 | | PVS1, PM2 | PVS1, PM2 | PVS1, PM2  - |
| *NMD prediction* | Predicted to be NMD  Predicted to be  NMD | Predicted to be NMD | - | - | - | Predicted to be NMD | | Predicted to be NMD |  | Predicted to be NMD  - |
| *ClinVar* | LP  No clinical evidence | No clinical evidence | No clinical evidence | No clinical evidence | No clinical evidence | LP | | No clinical evidence | No clinical evidence | No clinical evidence  - |
| *Inheritance* | Compound heterozyous | Homozygous | Homozygous | Homozygous | Homozygous | Homozygous | | Homozygous | Homozygous | Compound heterozyous |
| *Reference* | Kiper et al (2019)  This study | This study | This study | Huber et al (2009) | This study | Kiper et al (2019) | | This study | This study | This study |

**Supplemental Table 1. Continued**

|  |  | | | | | | | | |
| --- | --- | --- | --- | --- | --- | --- | --- | --- | --- |
| *Group* | ***OBSL1* (NM_015311.3)** *CCDC8* (NM_032040.5) | | | | | | | | |
| *Family* | 9 | 10 | 11 | 12 | 13 | 14 | 15 | 16 | 17 |
| *Patient* | 14 | 15 16 | 17 | 18 19 | 20 | 21 | 22 23 | 24 | 25 |
| *Genetics* |  | | | |  |  |  |  |  |
| *c. DNA* | c.1273dup | | | | c.2466delC | c.35dup | c.1276_1281del | 78 bp homozoygous deletion | c.29_35del |
| *Protein change* | p.T425Nfs*40 | | | | p.E823Sfs*96 | p.C13Vfs*241 | p.V426_K427del? | - | p.Y10Sfs*30 |
| *Population data* |  | | | |  |  |  |  |  |
| *gnomAD v4.0 (Allele Frequency)* | 0.000369 | | | | N/A | 0.0000862 | N/A | N/A | N/A |
| *gnomAD v4.0*  *homozygotes* | 1 (0.000451) | | | | N/A | 0 | N/A | N/A | N/A |
| *Turkish Variome* | 0.000358 | | | | N/A | N/A | N/A | N/A | N/A |
| *In silico prediction* |  | | | |  |  |  |  |  |
| *GERP score* | N/A | | | | N/A | N/A | N/A | N/A | N/A |
| *DANN* | N/A | | | | N/A | N/A | N/A | N/A | N/A |
| *Mutation Taster* |  | | | |  |  | - |  | N/A |
| *ACMG classification* | P | | | | LP | P | VUS | N/A | LP |
| *ACMG evidence* | PVS1, PM3, PM2, PP5 | | | | PVS1, PM2 | PVS1, PM3, PM2, PP5 | PM2, PM4 | N/A | PVS1, PM2 |
| *NMD prediction* | No confident prediction | | | | Predicted to be NMD | No confident prediction | - | N/A | - |
| *ClinVar* | P | | | | No clinical evidence | P | No clinical evidence | N/A | No clinical evidence |
| *Inheritance* | Homozygous | | | | Homozygous | Homozygous | Homozygous | Homozygous | Homozygous |
| *Reference* | Huber et al (2010) | | | | This study | Jacop et al (2020) | This study | This study | This study |

**Abbreviations: LP: likely pathogenic, P: pathogenic, N/A: not available, NMD: non-mediated decay**
