# Supplementary material for: Clinical and Molecular Spectrum Along With Genotype-Phenotype Correlation of 25 Patients Diagnosed With 3M Syndrome: A Study from Turkey
Source: Research Square preprint supplement (doi:10.21203/rs.3.rs-4764698/v1), 2024-08-19
Supplement: Supplementary file 4 [file 7dc373b186e4ea15b86c60d2.docx]

**Patients and samples:**

Three pediatric endocrinologists and one pediatric genetic specialist evaluated all cases. Dysmorphic features and anthropometric measurements were documented along with SDS, utilizing a national pediatric calculator that adheres to national standards (https://www.ceddcozum.com/). Demographic findings, family history, and clinical and radiographic findings were all obtained from retrospective data. The molecular genetic analysis was performed accordingly, including DNA sequencing and a targeted gene panel. Serum basal levels of IGF-1 and IGFBP-3 were assessed through immunoradiometric assays utilizing Roche Diagnostics (cobas® 6000) and subsequently analyzed. GH stimulation tests with levodopa and clonidine were conducted, accepting a peak GH level >7 ng/mL as indicative of a normal GH response.

**Radiological findings**

While all patients exhibited slender, long bones with diaphyseal construction (21/25, 84%), tall vertebrae were noted in 16 out of 25 patients (64%), ranging in age from 6 to 16 years. Conversely, Patients 2, 3, 8, 10, 11, 13, 17, 24, and 25, aged between three months and 10 years, did not demonstrate tall vertebrae, suggesting that the foreshortening of vertebral bodies becomes more noticeable as age progresses. Interestingly, copper beaten appearance was observed in 10 out of 25 patients (40%), which was not an expected finding during the course of the disease. Delayed bone age, a characteristic feature of the disease, was seen in 15 out of 25 patients (60%). In contrast to the literature, Patients 15 and 16 displayed advanced bone age. Mild vertebrae irregularity was noted in Patients 1, 4, and 15 (3/25, 12%). None of the patients exhibited severe scoliosis, kyphosis, or both. Patients 4, 11, 16, and 17 had mild thoracolumbar scoliosis, which was considered to be positional (4/25, 16%). Coxa vara deformity is another relevant finding during the disease observed in 9 out of 25 patients (38%) in our cohort. Patients 4 and 9 suffered from bilateral severe hip dysplasia with coxa valga deformity and a narrow pelvis, which required intervention multiple times. Patient 10 had unilateral hip dysplasia, which led to leg discrepancy and waddling gait (Table 1).
