# Supplementary material for: Clinical and Molecular Spectrum Along With Genotype-Phenotype Correlation of 25 Patients Diagnosed With 3M Syndrome: A Study from Turkey
Source: Research Square preprint supplement (doi:10.21203/rs.3.rs-4764698/v1), 2024-08-19
Supplement: Supplementary file 5 [file c8787540e29114a525a27f01.docx]

| Table 2. Descriptive Findings | All patients | CUL7 | OBSL1 | P value |
| --- | --- | --- | --- | --- |
| Gene (*CUL7*/*OBSL1/CCDC8/-*) | 13/11/1 | 13 | 11 | - |
| Gender (F/M) | 9F/16M | 6F/7M | 2F/9M | - |
| Birthweight, g (mean ± SD; min–max) | 2194 ± 245; 1500-2710 | 2175 ± 289; 1500-2710 | 2191 ± 190; 1750-2445 | 0.87 |
| Birthweight, SDS (mean ± SD; min–max) | -2.8 ± 0.6; -4.0-(-1.4) | -2.8 ± 0.7; -4.0-(-1.4) | -2.9 ± 0.5; -3.8-(-2.3) | 0.64 |
| Birthlength, cm (mean ± SD; min–max) | 42.7 ± 2.6; 38-48 | 43.2 ± 2.7; 39-48 | 42.0 ± 2.2; 38-45 | 0.18 |
| Birthlength, SDS (mean ± SD; min–max) | -2.9 ± 1.2; -4.8-0.8 | -2.5 ± 1.4; -4.5-0.8 | -3.4 ± 0.7; -4.8- (-2.5) | 0.76 |
| Age at admmison, years (mean ± SD; min–max) | 4.3 ± 4.1; 0.0-13.3 | 4.9 ± 4.3; 0.0-11.8 | 3.9 ± 4.0; 0.2-13.3 | 0.53 |
| Weight at admisson, kg (mean ± SD; min–max) | 11.5 ± 9.2; 2.7-48 | 11.0 ± 5.8; 2.7-19 | 12.7 ± 12.4; 3.4-48 | 0.64 |
| Weight at admission, SDS (mean ± SD; min–max) | -3.3 ± 1.2; -4.8-(-0.3) | -3.7 ±1.1; -4.8-(-1.4) | -2.9 ±1.1; -4.7-(-0.3) | 0.08 |
| Height at admission, cm (mean ± SD; min–max) | 80.6 ± 23.1; 48-140 | 82.7± 20.0; 56-111 | 81.0 ± 26.5; 48-140 | 0.86 |
| Height at admission, SDS (mean ± SD; min–max) | -4.7 ± 1.1; -6.9-(-2.5) | -5.4± 0.8; -6.9-(-4.5) | -3.9 ± 0.6; -4.6-(-2.5) | **0.000** |
| Age at diagnosis, years (mean ± SD; min–max) | 7.2 ± 4.7; 0.2-15.8 | 8.0 ±4.8; 0.5-15.8 | 7.0 ±4.7; 0.2-13.6 | 0.61 |
| Current age, years (mean ± SD; min–max) | 9.4 ± 5.7, 0.5-20.5 | 8.5 ± 4.5, 0.7-16 | 11.0 ± 6.8; 0.5-20.5 | 0.29 |
| Current weight, kg (mean ± SD; min–max) | 20.2 ± 12.7; 4.9-51 | 17.0 ± 7.5; 4.9-33.6 | 25.8 ± 17.3; 5-51 | 0.11 |
| Current weight, SDS (mean ± SD; min–max) | -3.2 ±1.4; -6.0-0.4 | -3.9 ± 1.2; -4.8-(-2.5) | -2.4 ±1.3; -4.4-0.4 | **0.01** |
| Current height, cm (mean ± SD; min–max) | 105.9± 27.7; 53-158 | 98.2 ± 18.8; 59-117.4 | 117.3 ± 33.6; 53.5-158 | 0.09 |
| Current height, SDS (mean ± SD; min–max) | -4.6 ± 1.4; -7.7- (-2.1) | -5.4 ± 1.2; -7.7- (-3.9) | -3.6 ± 0.8; -4.8- (-2.1) | **0.001** |
