# Supplementary material for: Clinical and Molecular Spectrum Along With Genotype-Phenotype Correlation of 25 Patients Diagnosed With 3M Syndrome: A Study from Turkey
Source: Research Square preprint supplement (doi:10.21203/rs.3.rs-4764698/v1), 2024-08-19
Supplement: Supplementary file 6 [file d516f01721658b1c3626de19.docx]

| Table 3. Growth hormone profiles of the present patients | | | | | | | | |  |
| --- | --- | --- | --- | --- | --- | --- | --- | --- | --- |
|  | ***CUL7*** |  |  |  |  |  |  |  |  |
| Family | 1 | | | 2 | 3 | 4 | | 9 | 10 |
| Patient | 1 | 2 | 3 | 4 | 5 | 6 | 7 | 12 | 13 |
| IGF1 (ng/ml-SD) | 51.9/-2.34 | 49.5/-2.5 | 43.6/-3.0 | 254.2/-1.3 | 129/0.2 | 134/-0.3 | 78/-0.8 | 34.4/-1.0 | 5.3/-3.0 |
| IGFB3 (ng/ml) | 3450/0.5 | 2190/-0.2 | 2580/0.7 | 3894/-1.4 | 3549/-0.3 | 3278/-0.6 | 3288/0.3 | 2785/1.0 | 2114/-1.0 |
| Peak GH response to GHST (L-Dopa/ Clonidine ng/ml) | 11.4 | 19.3 | 13.3 | - | 14.1 | 14.6 | 17.9 | - | - |
| IGF generation test  (mcg/kg /gün) | 0.033 | 0.033 | 0.033 | - | - | 0.033 | 0.033 | - | - |
| GH treatment dose (mg/kg/gün) | 0.05 | 0.05 | 0.*038* | - | - | 0.*038* | - | - | - |
| GH duration (years) | 3 | 3 | 2 | - | - | 2 | - | - | - |
| Growth velocity (cm/year) | <4 | <4 | <4 | - | - | <4 | - | - | - |
| Age at initial treatment (years) | 4.8 | 3.4 | 2.4 | - | - | 4 | - | - | - |
| Height before treatment (SD) | 85/-5.4 | 77.6/-5.0 | 72.5/-4.7 | - | - | N/A | - | - | - |
| Height after treatment (SD) | 106 /-5.1 | 97.8/-4.8 | 90/-5.2 | - | - | N/A | - | - | - |
|  |  |  |  |  |  |  |  |  |  |
|  | ***OBSL1*** |  |  |  |  |  |  |  | ***CCDC8*** |
| Family | 11 | 12 | | 13 | 14 | | 17 | | 19 |
| Patient | 14 | 15 | 16 | 17 | 18 | 19 | 22 | 23 | 25 |
| IGF1 (ng/ml-SD) | 52.6/-1.2 | 104.1/-0.8 | 322.1/0.4 | 41.9/-2.2 | 156/3.3 | 218/0.3 | 95/-0.1 | 84/-0.7 | 73.54/-0.8 |
| IGFB3 (ng/ml) | 2392/ 0.2 | 3470/-0.1 | 5110/-0.0 | 1090/-1.3 | 4390/1.6 | 4690/-0.2 | 2576/0.3 | 1894/-0.5 | 1254/-1.0 |
| Peak GH response to GHST (L-Dopa/ Clonidine ng/ml) | 6.8 | 15.5 | - | 15.4 | - | 16 | 15.9 | 7.5 | - |
| IGF generation test | - | - | - | + | - | - | + | + | - |
| GH treatment dose (mg/kg/gün) | 0.05 | - | - | 0.03-0.05 | - | - | - | - | - |
| GH duration (years) | 1 | - | - | 6 | - | - | 2 | 2 | - |
| Growth velocity (cm/year) | 8 |  |  | 9.7 | - | - | <4 | <4 | - |
| Age at initial treatment (years) | 5.5 | - | - | 3.25 | - | - | 8 | 7 | - |
| Height before treatment (cm/SD) | 92.7/-4.4 | - | - | 81/-4.4 | - | - | N/A | N/A | - |
| Height after treatment (SD)/ Final height | 96.8/-4.0 | - |  | 99.2/-2.79 | - | - | 158/-2.7 | 148/-2.6 | - |
